# Supplementary figures and images for: Asymmetric deposition on high-speed moving superhydrophobic surfaces
Source: Royal Society of Chemistry journal article supplement (doi:10.1039/d4ta00827h), 2024-01-01

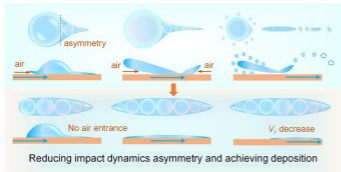

Supplement: d4ta00827h1.pdf [file d4ta00827h1.pdf]
